# Supplementary material for: Combining β-Carotene with 5-FU via Polymeric Nanoparticles as a Novel Therapeutic Strategy to Overcome uL3-Mediated Chemoresistance in p53-Deleted Colorectal Cancer Cells
Source: PubMed Central journal article supplement (PMC10155186; doi:10.1021/acs.molpharmaceut.2c00876), 2023-03-28
Supplement: mp2c00876_si_001.pdf [file mp2c00876_si_001.pdf]

# Combining $\beta$ -Carotene with 5-FU via Polymeric Nanoparticles as a Novel Therapeutic Strategy to Overcome uL3-Mediated Chemoresistance in p53-Deleted Colorectal Cancer Cells

Pietro Carotenuto,<sup>1,2</sup> Annalisa Pecoraro,<sup>1,3</sup> Chiara Brignola,<sup>3</sup> Anna Barbato,<sup>1</sup> Brunella Franco,<sup>1,2,4</sup> Giuseppe Longobardi,<sup>3</sup> Claudia Conte,<sup>\*3</sup> Fabiana Quaglia,<sup>3</sup> Giulia Russo,<sup>3</sup> and Annapina Russo<sup>\*3</sup>

<sup>1</sup> TIGEM, Telethon Institute of Genetics and Medicine, 80078 Naples, Italy

<sup>2</sup> Medical Genetics, Department of Translational Medical Science, University of Naples “Federico II”, 80131, Naples, Italy

<sup>3</sup> Department of Pharmacy, University of Naples “Federico II”, 80131, Naples, Italy

<sup>4</sup> Scuola Superiore Meridionale, School for Advanced Studies, 80138, Naples, Italy

⊥ These authors equally contributed to the paper

\* Correspondence to: Annapina Russo and Claudia Conte

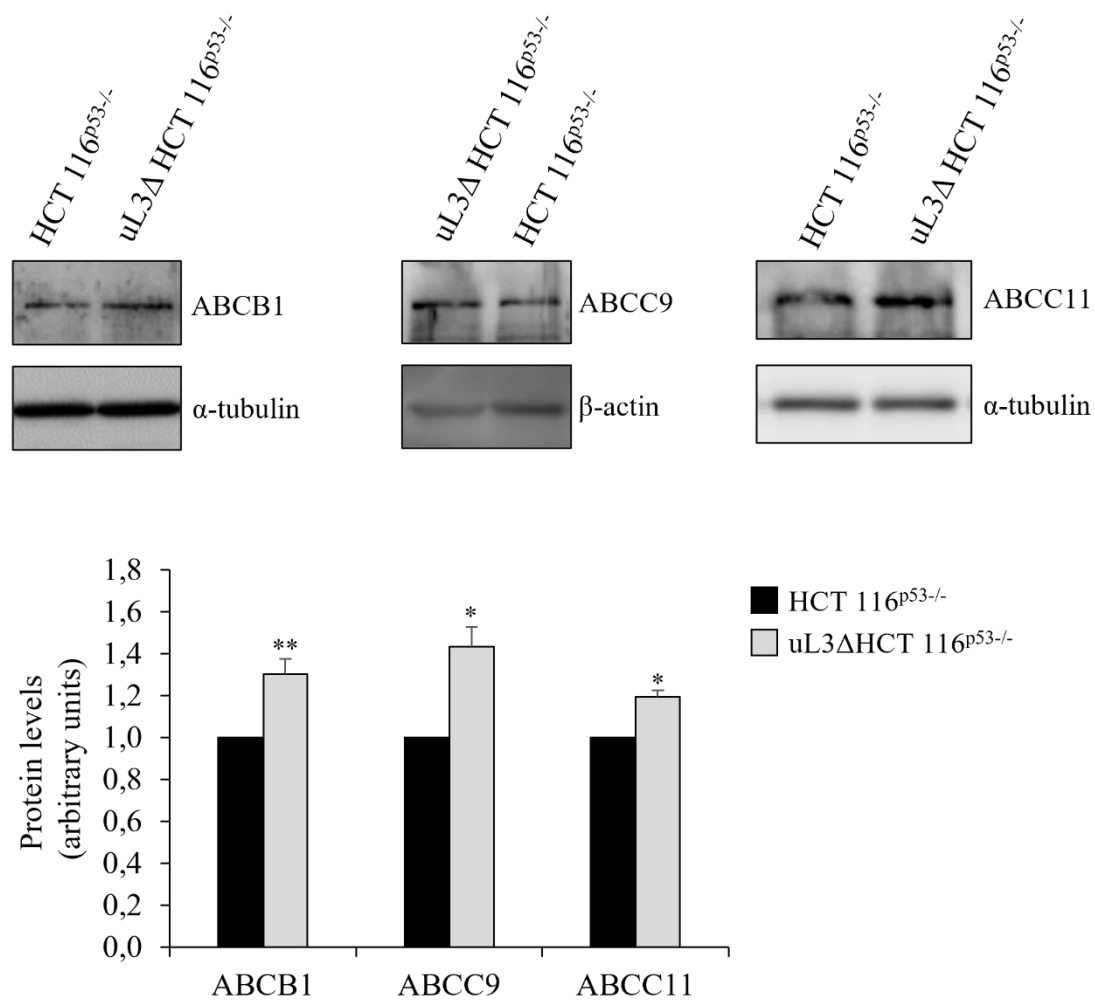

**Figure S1.** Expression analysis of ABCB1, ABCC9 and ABCC11 in HCT 116<sup>p53-/-</sup> and uL3ΔHCT 116<sup>p53-/-</sup> cells. Protein extracts were analyzed by western blotting with the indicated antibodies.  $\alpha$ -tubulin and  $\beta$ -actin were used as loading controls. Full length blots are presented in Figure S5. Quantification of signals is shown. Bars represent the mean of triplicate experiments; error bars represent the standard deviation. \* $p < 0.05$ ; \*\* $p < 0.01$  vs HCT 116<sup>p53-/-</sup> cells set at 1.

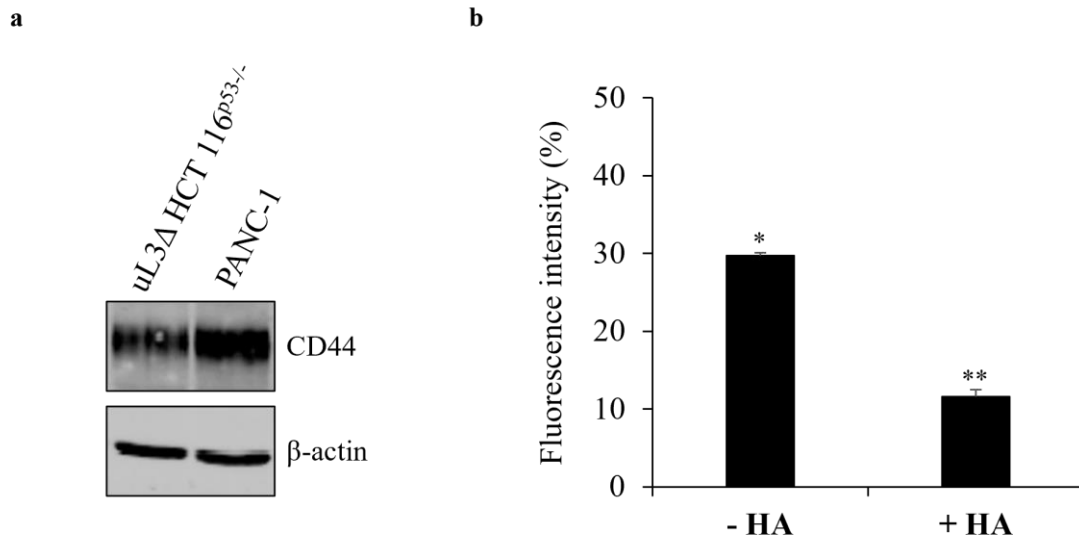

**Figure S2.** Expression analysis of CD44 receptor and cellular up-take of Rhodamine B-labeled NPs in uL3ΔHCT 116<sup>p53-/-</sup> cells. (a) Protein extracts from uL3ΔHCT 116<sup>p53-/-</sup> and PANC-1 (positive control) cells were analyzed by western blotting with the indicated antibodies.  $\beta$ -actin was used as loading controls. Full length blots are presented in Figure S6. (b) Cells were pre-treated or not with free HA for 1 h to block the CD44 receptor. Then, cells were incubated with Rhodamine B-labeled NPs for 2 h. Bars represent the mean of triplicate experiments; error bars represent the standard deviation. \* $p < 0.05$ ; \*\* $p < 0.01$  vs control set as 100%.

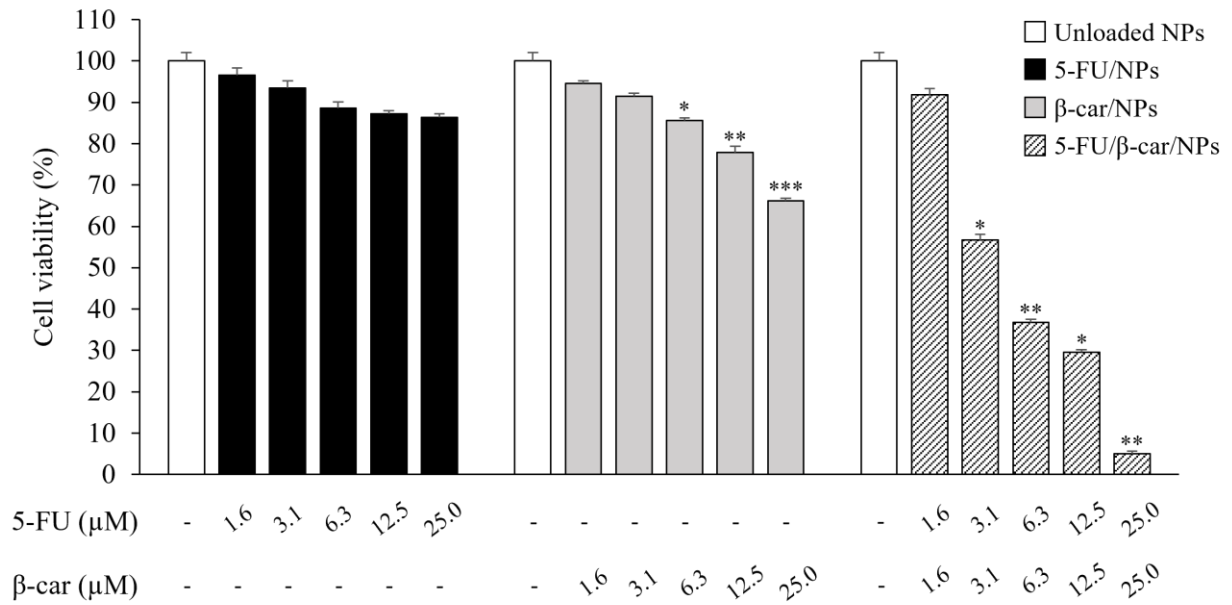

**Figure S3.** Cytotoxicity of 5-FU/NPs,  $\beta$ -car/NPs and 5-FU/ $\beta$ -car/NPs in uL3 $\Delta$ HCT 116<sup>p53-/-</sup> cells. Cells were treated with unloaded NPs or NPs loaded with a wide range of 5-FU and/or  $\beta$ -carotene (from 1,6 to 25,0  $\mu$ M). After 48 h, cell viability was evaluated by CCK-8 assay. Bars represent the mean of triplicate experiments; error bars represent the standard deviation. \* $p < 0.05$ ; \*\* $p < 0.01$ ; \*\*\* $p < 0.001$  vs unloaded NP-treated cells set as 100%.

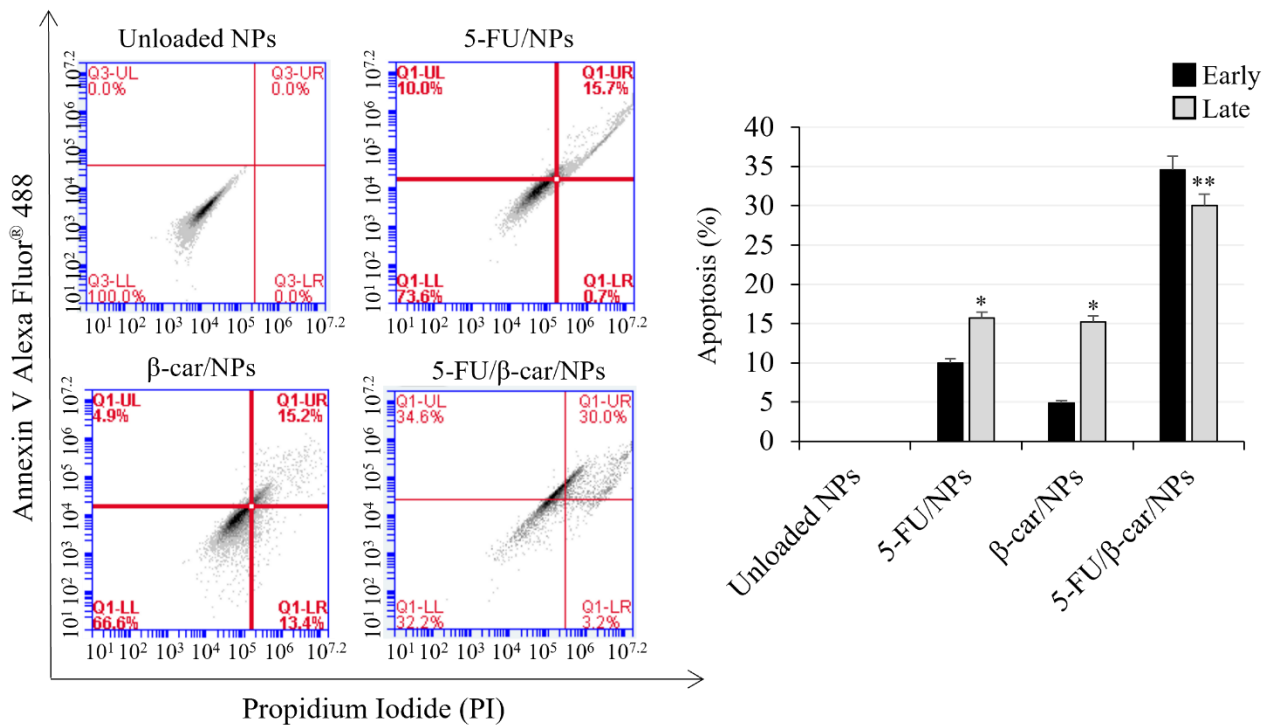

**Figure S4.** Effect of 5-FU and  $\beta$ -carotene treatment on apoptosis in HCT 116<sup>p53-/-</sup> cells. Representative flow cytometry dot blots with double Annexin V-Alexa Fluor 488/PI staining for cells treated with unloaded NPs, 5-FU/NPs,  $\beta$ -car/NPs, or 5-FU/ $\beta$ -car/NPs for 48 h. The bar diagram shows the percentage of early (Annexin V positive/PI negative) and late (Annexin V/PI positive) apoptotic cells. For each sample, at least  $2 \times 10^4$  events were analyzed. \* $p < 0.05$ ; \*\* $p < 0.01$  vs unloaded NP-treated cells.

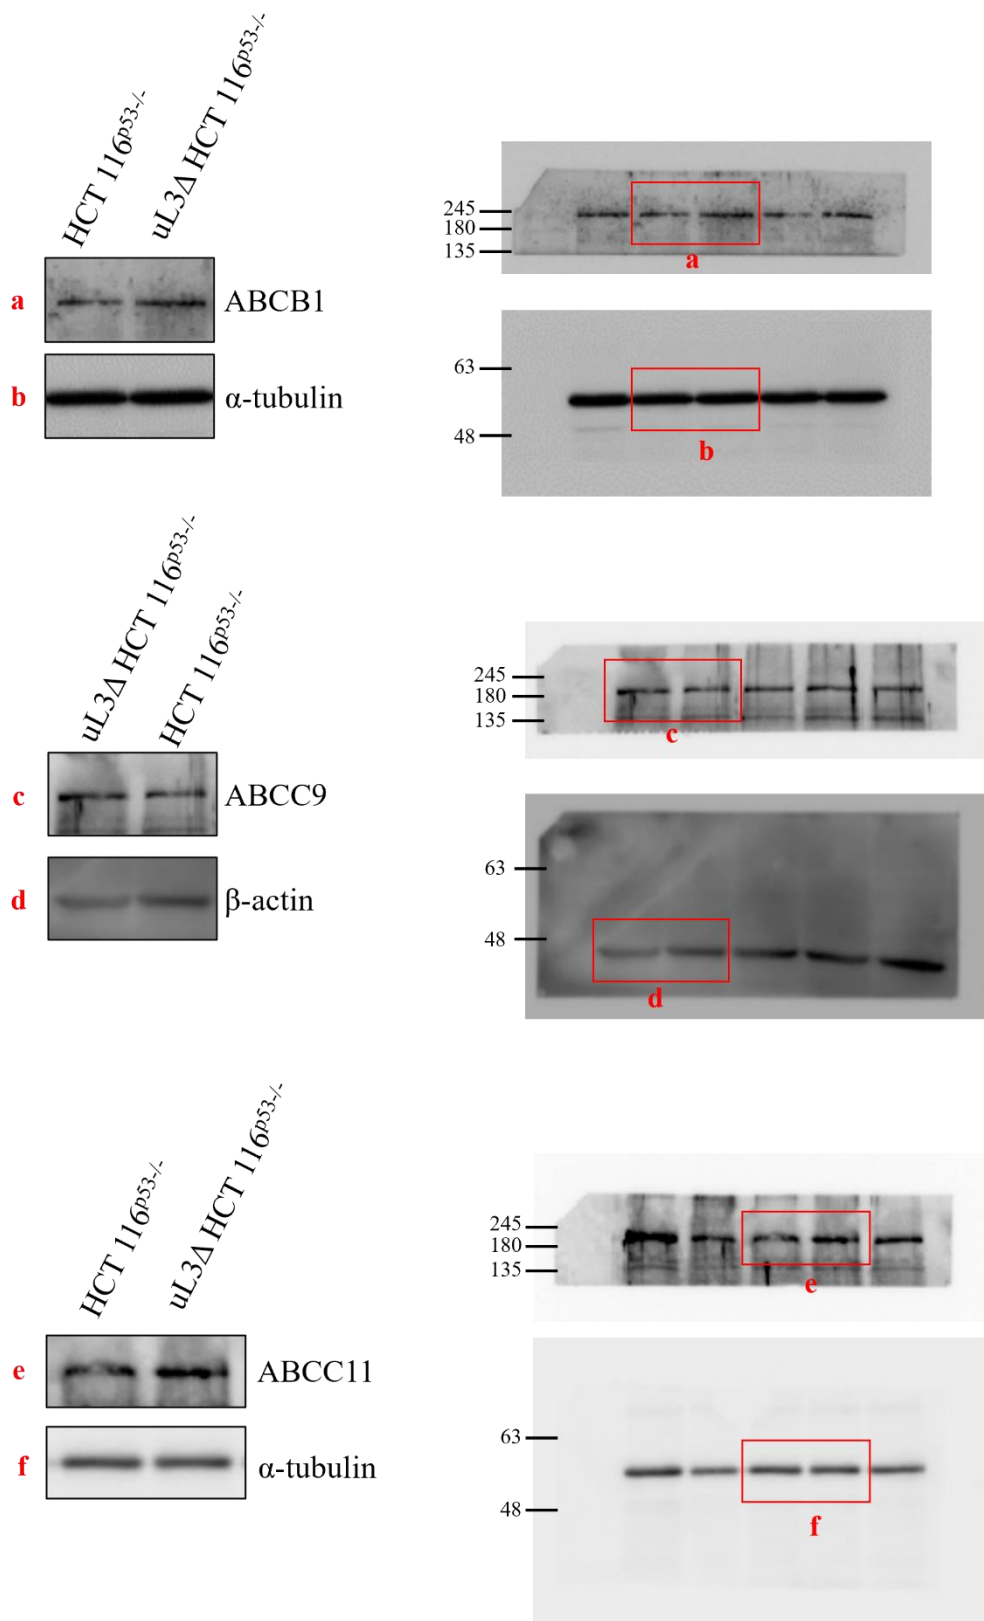

**Figure S5.** Full length blots of Figure S1.

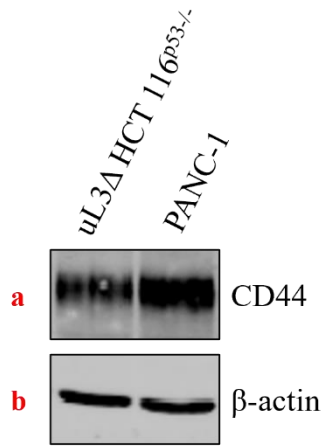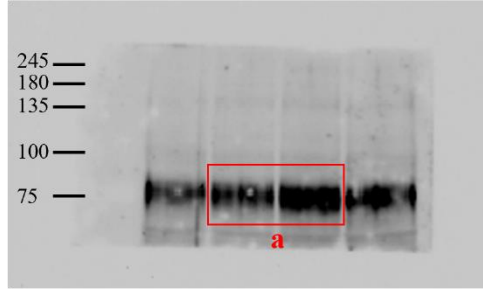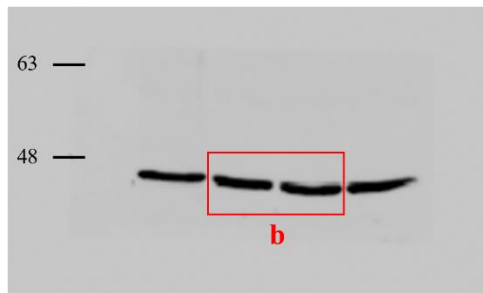

**Figure S6.** Full length blots of Figure S2a.

## **EXPERIMENTAL SECTION**

### **Cell cultures**

PANC-1 cell line (American Type Culture Collection, (ATCC) Manassas, Virginia, USA) were cultured in Dulbecco's Modified Eagle's Medium (DMEM) supplemented with 10% fetal bovine serum (FBS), 2 mM L-glutamine, penicillin-streptomycin 50 U/ml.

### **Western blot**

Western blot analysis was performed as previously reported.<sup>64</sup> The membranes were challenged with anti-CD44 (Cell Signaling Technology, Danvers, MA, USA), anti-ABCC9, anti-ABCC11 (ThermoFisher, Loughborough, UK), and anti-ABCB1, anti- $\alpha$ -tubulin, anti- $\beta$ -actin (Santa Cruz, Dallas, TX, USA). Proteins were visualized with an enhanced chemiluminescence detection reagent according to the manufacturer's instructions (Elabscience®, Houston, TX, USA).

### **Preparation of fluorescent NPs**

Fluorescent NPs were prepared by solvent diffusion of an organic phase (2 mL) in an aqueous phase (4 mL of water with Pluronic F68 0.1%). The organic phase was prepared by dissolving 8 mg of PLGA 502H and 2 mg of PLGA-RHO (PLGA-Rhodamine B, Sigma-Aldrich, Italy) in 2 mL of acetone. After solvent removal under reduced pressure and room temperature, the sample was split into 4 Eppendorf tubes, centrifuged (5000 x g for 20 minutes) and redispersed in water (1 mL). After that, 125  $\mu$ L of a PEI solution (2.5 mg/mL) was added, and the samples were washed by centrifugation (2800 x g for 20 min) and redispersed in 1 mL of water. Final NPs were obtained by adding 100  $\mu$ L of HA in water (1 mg/mL). The interval between each addition was kept constant at 15 min. The hydrodynamic diameter (DH), polydispersity index, and zeta potential ( $\xi$ ) of NPs were determined on a Zetasizer Nano ZS (Malvern Instruments Ltd). Results are reported as the mean of three separate measurements on three different batches  $\pm$  standard deviation (n = 9).



**Table S1.** Properties of fluorescent NPs.

| <b>Batch</b> | <b>Size<br/>(nm ± SD)</b> | <b>P.I.</b> | <b>ζ<br/>(mV ± SD)</b> |
|--------------|---------------------------|-------------|------------------------|
| RHO-PLGA NPs | 224 ± 0.11                | 0.2         | -26.3                  |

### Cellular uptake of NPs

The uptake of NPs was evaluated using Rhodamine B-labeled NPs (0.05 mg/mL) by measuring the incorporation of the fluorochrome Rhodamine B in uL3ΔHCT 116<sup>p53<sup>-/-</sup></sup> cells. Briefly, cells were plated at a density of  $1 \times 10^4$  cells per well in 24-well plates and pretreated with free HA (10 mg/ml) for 1 h before the addition of NPs. Then, cells were incubated with 50 μg/mL of Rhodamine B-labeled NPs. After 2 h, cells were collected and analyzed by fluorimetry. The fluorescence was measured with a Cary Eclipse fluorescence spectrophotometer (Varian). Excitation and emission wavelengths were 546 and 568 nm, respectively.

### CCK-8 assay

The CCK-8 kit (Dojindo, Shanghai, China) was used to measure cytotoxicity of 5-FU/NPs, β-car/NPs or 5-FU/β-car/NPs on uL3ΔHCT 116<sup>p53<sup>-/-</sup></sup> cells. A total of 5,000 cells in a volume of 100 μl per well were cultured in three replications in a 96-well plate. The CCK-8 was mixed with medium (10 μl per well) into each well and incubated at 37°C, 5% CO<sub>2</sub> for 120 min. The cell viability was determined by the measurement of the OD<sub>450</sub> value at 48 h of treatment.
